# Supplementary material
Source: publisher figshare collection journal article supplement (https://tandf.figshare.com/ndownloader/files/16881914)
Supplement: Supplementary file 1 [file 16881914]

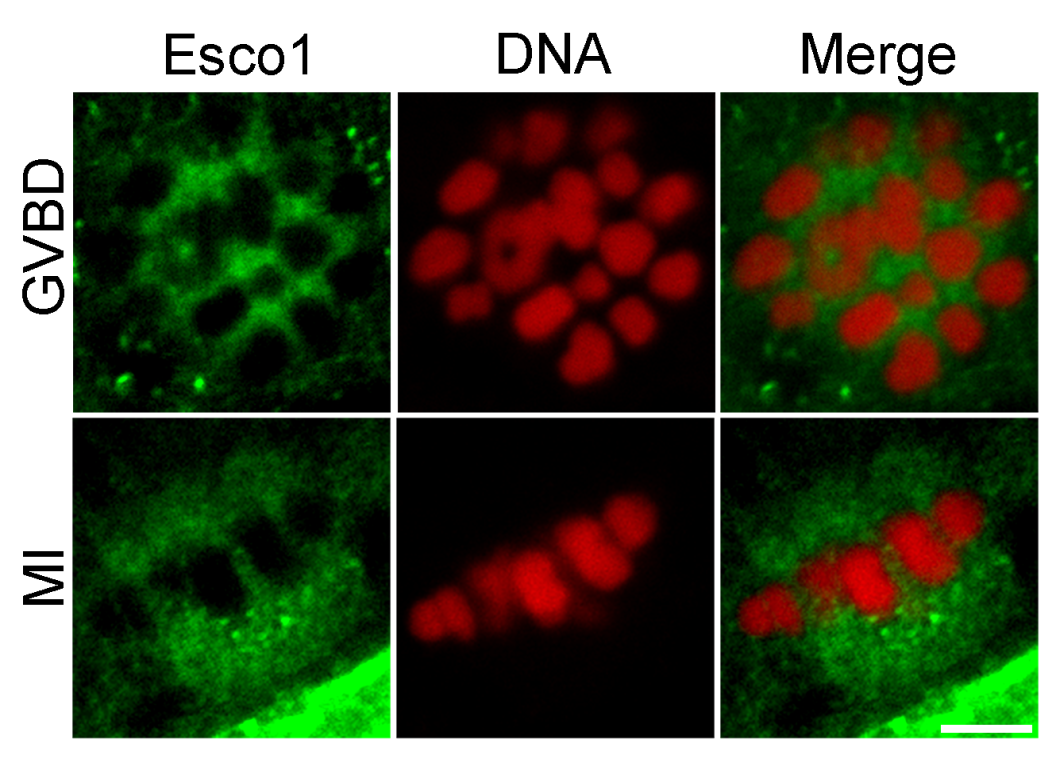


Fig. S1. Subcellular localization of endogenous Esco1 in porcine oocytes. (A) Porcine oocytes at GVBD and M I and stages were immunostained with Esco1 antibody (green) and counterstained with PI (red). Images were acquired under the confocal microscope. Scale bar, 2.5 μm.
